# Supplementary material for: Identification of Genes Promoting Growth of Ustilago maydis on Biomolecules Released from Cells Killed by Oxidation
Source: MDPI journal article supplement (doi:10.3390/jof8090957), 2022-09-13

Figure S1. Gene expression level analysis

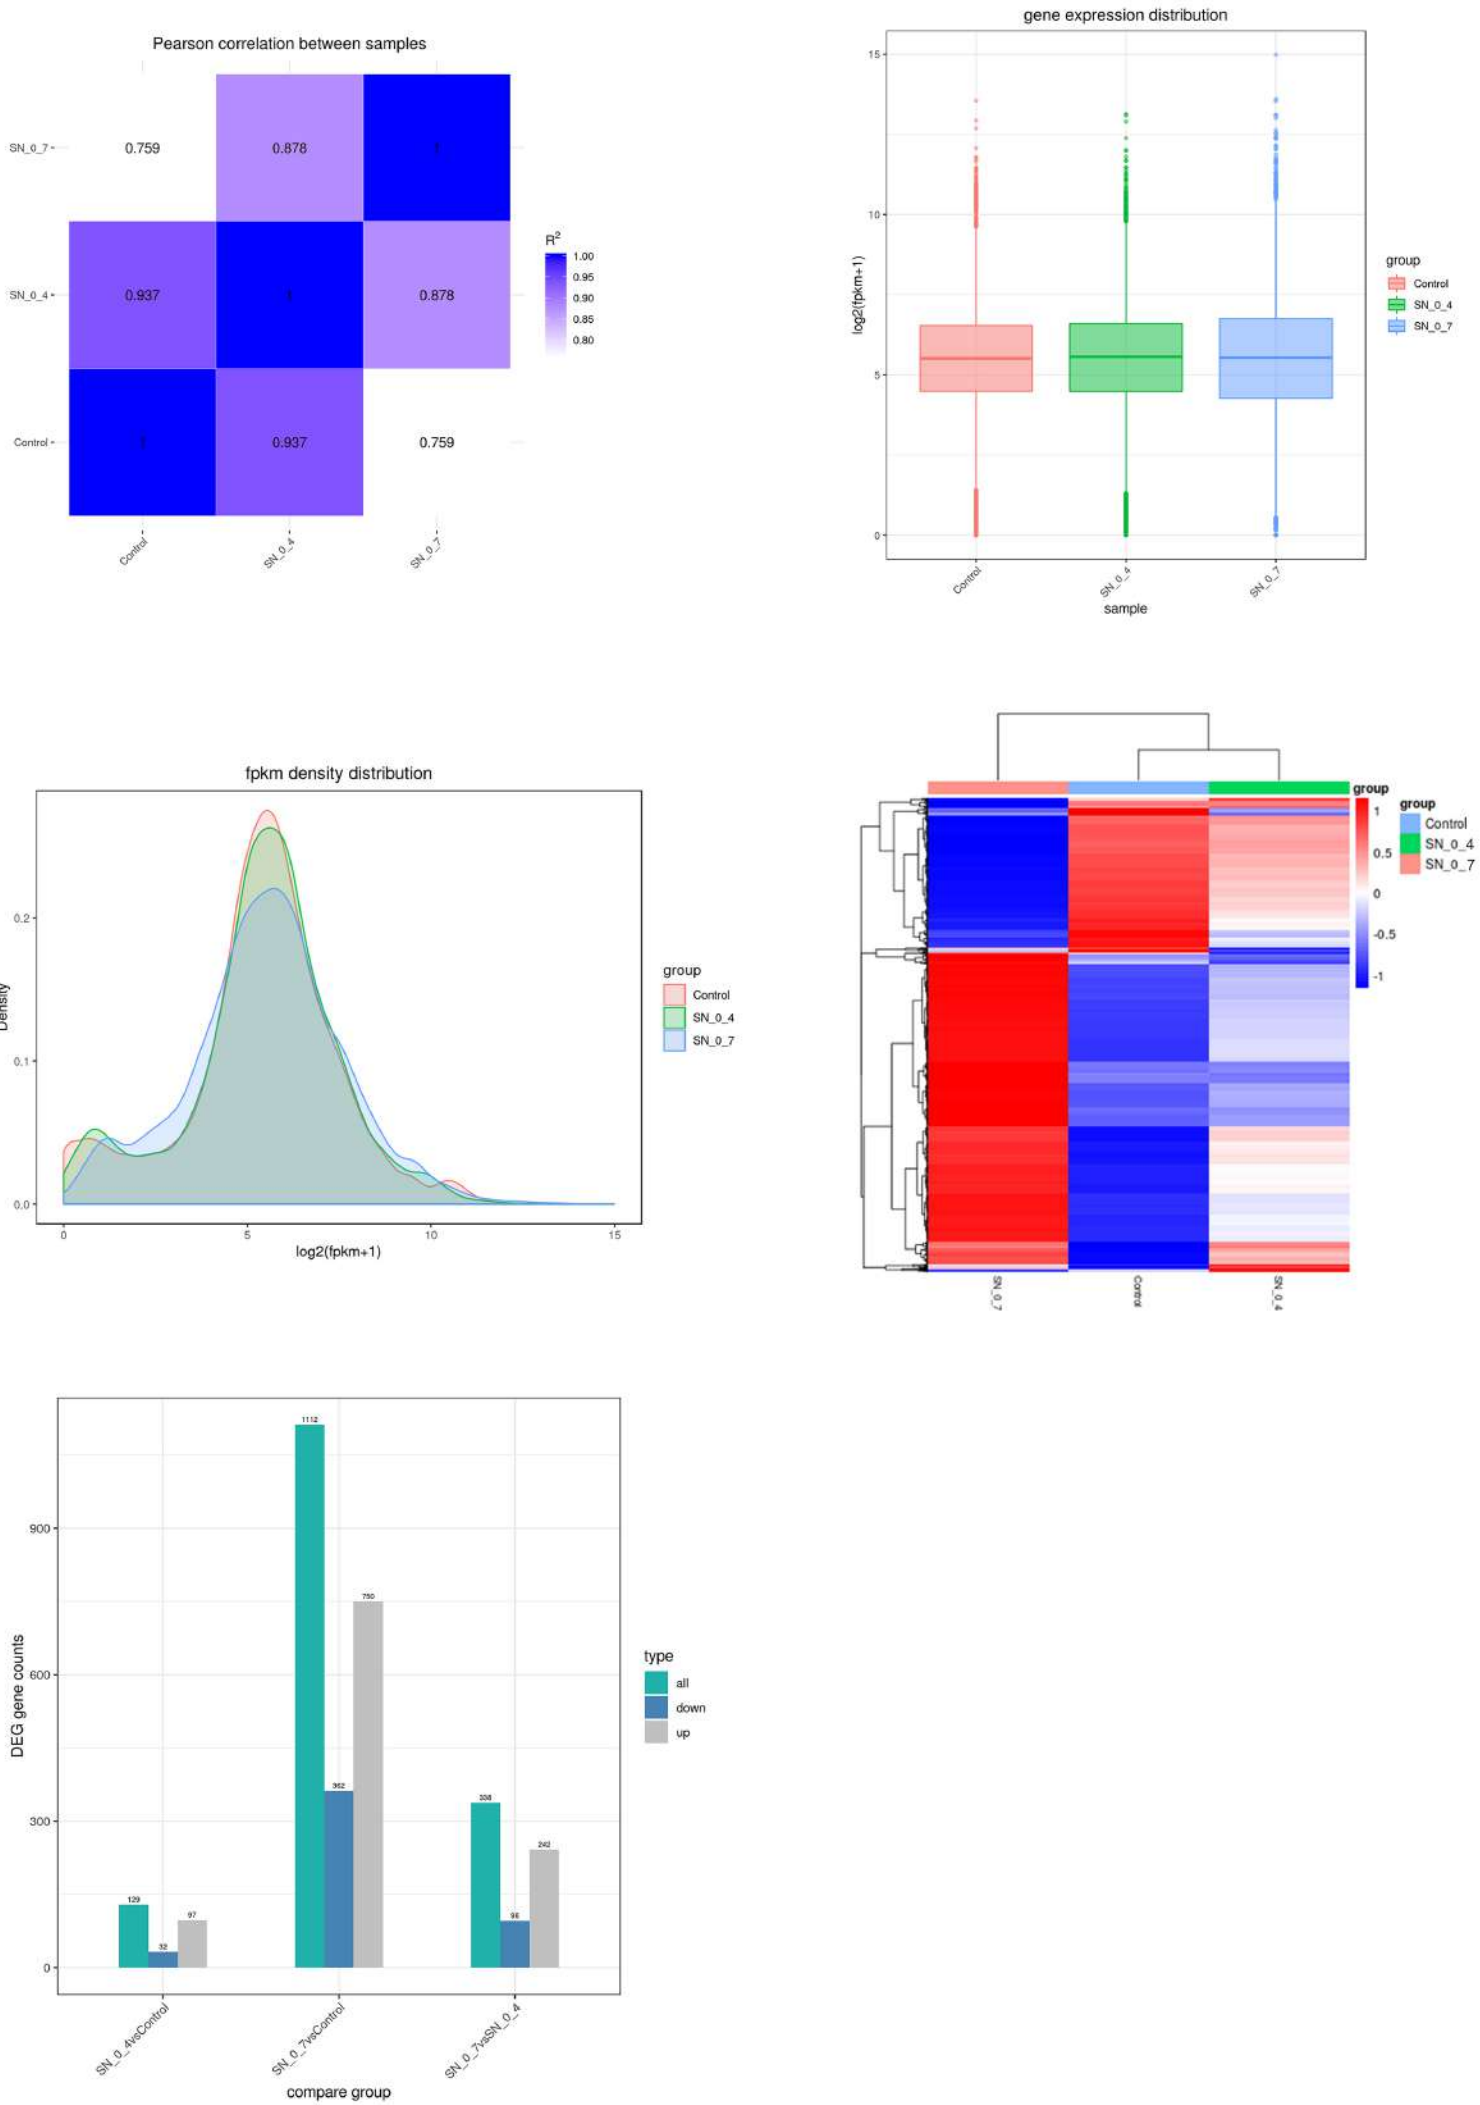

Figure S2. KEGG enrichment of differentially expressed genes

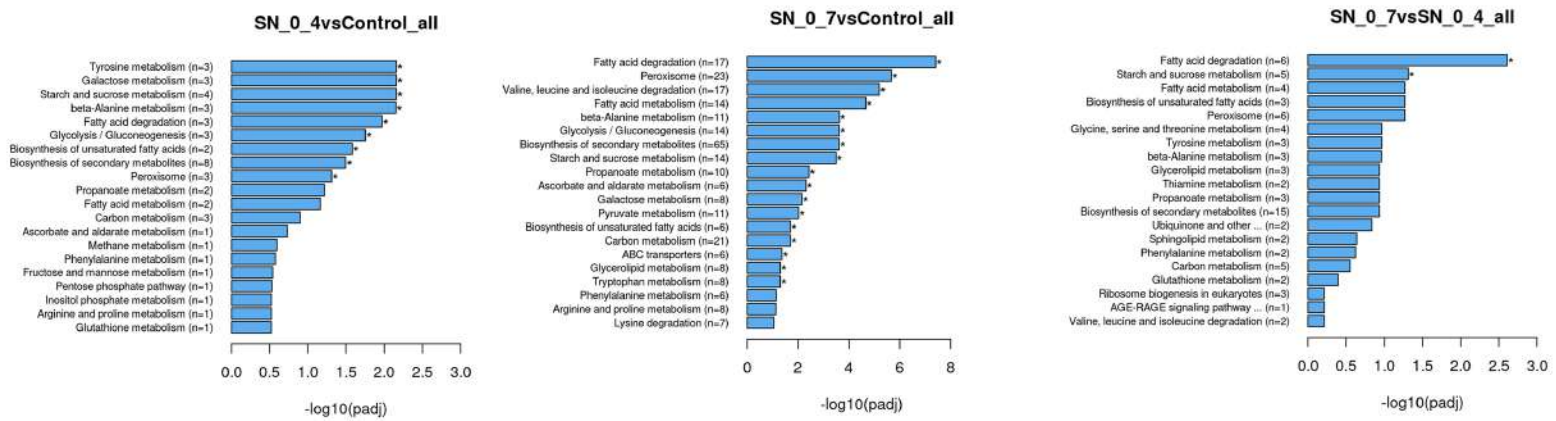

Supplement: s1 [file s1]
